# Supplementary material for: Efficacy of Immune Checkpoint Inhibitor (ICI) Rechallenge in Advanced Melanoma Patients’ Responders to a First Course of ICI: A Multicenter National Retrospective Study of the French Group of Skin Cancers (Groupe de Cancérologie Cutanée, GCC)
Source: MDPI journal article supplement (doi:10.3390/cancers15143564), 2023-07-10

## Supplemental tables and figure:

**Supplemental Table S1:** Characteristics of the disease before first and second course (ICI rechallenge) of immune checkpoint inhibitor immunotherapy

|                                              | First ICI<br>Total, N = 85, 100% | Second ICI<br>Total, N = 85, 100% |
|----------------------------------------------|----------------------------------|-----------------------------------|
| <b>AJCC stage</b>                            |                                  |                                   |
| IIIB (%)                                     | 4 (5)                            | 0 (0)                             |
| IIIC (%)                                     | 15 (18)                          | 7 (8)                             |
| IIID (%)                                     | 3 (3)                            | 3 (4)                             |
| IV (%)                                       | 63 (74)                          | 75 (88)                           |
| <b>Number of metastatic sites</b>            |                                  |                                   |
| ≤3 (%)                                       | 40 (47)                          | 48 (57)                           |
| > 3 (%)                                      | 45 (53)                          | 37 (43)                           |
| <b>Brain metastasis</b>                      |                                  |                                   |
| n (%)                                        | 16 (19)                          | 22 (26)                           |
| <b>Elevated LDH level</b>                    |                                  |                                   |
| No (%)                                       | 47 (55)                          | 55 (65)                           |
| Yes (%)                                      | 12 (14)                          | 11 (13)                           |
| Unknown (%)                                  | 26 (31)                          | 19 (22)                           |
| <b>Corticosteroids (ICI rechallenge)</b>     |                                  | 9 (11)                            |
| > 10 mg/day (%)                              |                                  | 6 (7)                             |
| ≤ 10 mg/day (%)                              |                                  | 3 (4)                             |
| <b>Immunotherapy (ICI)</b>                   |                                  |                                   |
| Pembrolizumab (%)                            | 41 (48)                          | 44 (52)                           |
| Nivolumab (%)                                | 27 (32)                          | 35 (41)                           |
| Ipilimumab (%)                               | 10 (12)                          | 2 (2)                             |
| Ipilimumab + Nivolumab (%)                   | 7 (8)                            | 4 (5)                             |
| <b>Duration of ICI (months)</b>              |                                  |                                   |
| Median [range]                               | 15 [1 – 51]                      | 9 [1 – 72]                        |
| <b>Response to ICI</b>                       |                                  |                                   |
| Complete response (%)                        | 47 (55)                          | 30 (35)                           |
| Partial response (%)                         | 28 (33)                          | 16 (19)                           |
| Stable disease (%)                           | 10 (12)                          | 18 (21)                           |
| Progression (%)                              | 0 (0)                            | 21 (25)                           |
| <b>Time to relapse (months)</b>              |                                  |                                   |
| Median [range]                               | 14 [2 - 54]                      | 11 [0.1 - 63]                     |
| <b>Time to best response to ICI (months)</b> |                                  |                                   |
| Median [range]                               | 11 [0.6 – 48]                    | 3 [0.5 - 34]                      |
| <b>Toxicity</b>                              | 43 (51)                          | 23 (27)                           |
| Cutaneous (%)                                | 14 (16)                          | 8 (9)                             |
| Endocrinal (%)                               | 14 (16)                          | 4 (5)                             |
| Digestive (%)                                | 7 (8)                            | 6 (7)                             |
| Liver (%)                                    | 10 (12)                          | 3 (4)                             |
| Respiratory (%)                              | 3 (4)                            | 2 (2)                             |
| Hematological (%)                            | 1 (1)                            | 2 (2)                             |
| Neuromuscular (%)                            | 3 (4)                            | 0 (0)                             |
| Renal                                        | 0 (0)                            | 1 (1)                             |
| Rheumatological (%)                          | 4 (5)                            | 2 (2)                             |
| Cardiac (%)                                  | 1 (1)                            | 0                                 |
| <b>Grade of toxicity</b>                     |                                  |                                   |
| Grade I (%)                                  | 10 (12)                          | 6 (7)                             |
| Grade II (%)                                 | 15 (18)                          | 7 (8)                             |
| Grade III (%)                                | 17 (20)                          | 8 (9)                             |
| Grade IV (%)                                 | 2 (2)                            | 1 (1)                             |
| Grade V (%)                                  | 0                                | 0                                 |
| <b>Time to toxicity (months)</b>             |                                  |                                   |
| Median [range]                               | 5 [0.6 – 43]                     | 3 [0.4 – 36]                      |

AJCC: American joint committee on cancer, ECOG: Eastern cooperative oncology group, ICI: Immune checkpoint inhibitor, LDH: Lactate dehydrogenase.

**Supplemental Table S2:** Univariate and multivariate analyses for factors associated with progression free survival during ICI rechallenge

| Variable                                              | Univarious model |               |         | Multivarious model |              |         |
|-------------------------------------------------------|------------------|---------------|---------|--------------------|--------------|---------|
|                                                       | HR               | 95% CI        | P-value | HR                 | 95% CI       | P-value |
| <b>Age (years)</b>                                    | 1.001            | 0.98, 1.024   | 0.958   |                    |              |         |
| <b>Gender</b>                                         |                  |               | 0.273   |                    |              |         |
| Male                                                  | 1                | —             |         |                    |              |         |
| Female                                                | 0.702            | 0.373, 1.321  |         |                    |              |         |
| <b>ECOG performance status (ICI rechallenge)</b>      |                  |               | 0.668   |                    |              |         |
| 0/1                                                   | 1                | —             |         |                    |              |         |
| ≥ 2                                                   | 1.295            | 0.398, 4.218  |         |                    |              |         |
| <b>Type of primary melanoma</b>                       |                  |               | 0.439   |                    |              |         |
| Cutaneous                                             | 1                | —             |         |                    |              |         |
| Other                                                 | 1.330            | 0.646, 2.737  |         |                    |              |         |
| <b>BRAFV600 mutation</b>                              |                  |               | 0.600   |                    |              |         |
| No                                                    | —                | —             |         |                    |              |         |
| Yes                                                   | 1.203            | 0.603, 2.399  |         |                    |              |         |
| <b>Response to 1st ICI</b>                            |                  |               | 0.511   |                    |              |         |
| Complete response + Partial response                  | 1                | —             |         |                    |              |         |
| Stable disease                                        | 1.318            | 0.578, 3.006  |         |                    |              |         |
| <b>Duration of 1st ICI (months)</b>                   | 1.022            | 0.99, 1.052   | 0.139   | 1.033              | 1.003, 1.063 | 0.031   |
| <b>Time to relapse after 1st ICI (months)</b>         |                  |               | 0.248   |                    |              |         |
| ≤ 6 months                                            | 1                | —             |         |                    |              |         |
| > 6 months                                            | 0.680            | 0.353, 1.309  |         |                    |              |         |
| <b>Systemic treatment between the ICI courses</b>     |                  |               | 0.008   |                    |              | 0.016   |
| No                                                    | 1                | —             |         | 1                  | —            |         |
| Yes                                                   | 2.548            | 1.272, 5.104  |         | 2.382              | 1.173, 4.835 |         |
| <b>Local treatment between the ICI courses</b>        |                  |               | 0.051   |                    |              |         |
| No                                                    | 1                | —             |         |                    |              |         |
| Yes                                                   | 1.965            | 0.997 ; 3.872 |         |                    |              |         |
| <b>Number of metastatic sites (ICI rechallenge)</b>   |                  |               | 0.010   |                    |              | 0.007   |
| > 3                                                   | 1                | —             |         | 1                  | —            |         |
| ≤ 3                                                   | 0.448            | 0.243, 0.826  |         | 0.421              | 0.224, 0.793 |         |
| <b>Brain metastasis (ICI rechallenge)</b>             |                  |               | 0.603   |                    |              |         |
| No                                                    | 1                | —             |         |                    |              |         |
| Yes                                                   | 1.192            | 0.615, 2.312  |         |                    |              |         |
| <b>Elevated LDH level (ICI rechallenge)</b>           |                  |               | 0.312   |                    |              |         |
| No                                                    | 1                | —             |         |                    |              |         |
| Yes                                                   | 1.717            | 0.730, 4.040  |         |                    |              |         |
| Unknown                                               | 1.540            | 0.763, 3.109  |         |                    |              |         |
| <b>Corticosteroids (ICI rechallenge)</b>              |                  |               | 0.307   |                    |              |         |
| No                                                    | 1                | —             |         |                    |              |         |
| Yes                                                   | 1.575            | 0.658, 3.765  |         |                    |              |         |
| <b>2<sup>nd</sup> course of ICI (ICI rechallenge)</b> |                  |               | 0.385   |                    |              |         |
| Rechallenge                                           | 1                | —             |         |                    |              |         |
| Escalation                                            | 1.528            | 0.364, 6.405  |         |                    |              |         |
| Switch                                                | 0.473            | 0.143, 1.565  |         |                    |              |         |
| <b>Toxicity (ICI rechallenge)</b>                     |                  |               | 0.163   |                    |              |         |
| No                                                    | 1                | —             |         |                    |              |         |
| Yes                                                   | 0.599            | 0.292, 1.230  |         |                    |              |         |

CI: Confidence interval, ECOG: Eastern cooperative oncology group, ICI: Immune checkpoint inhibitor, LDH: Lactate dehydrogenase, OR: Odds ratio. Only factors which are significant are shown in multivariate analysis

**Supplemental Table S3:** Univariate and multivariate analyses for factors associated with overall survival during ICI rechallenge

| Variable                                              | Univarious model |              |         | Multivarious model |              |         |
|-------------------------------------------------------|------------------|--------------|---------|--------------------|--------------|---------|
|                                                       | HR               | 95% CI       | P-value | HR                 | 95% CI       | P-value |
| <b>Age (years)</b>                                    | 1.007            | 0.97, 1.040  | 0.677   |                    |              |         |
| <b>Gender</b>                                         |                  |              | 0.436   |                    |              |         |
| Male                                                  | 1                | —            |         |                    |              |         |
| Female                                                | 0.711            | 0.301, 1.679 |         |                    |              |         |
| <b>Type of primary melanoma</b>                       |                  |              | 0.252   |                    |              |         |
| Other                                                 | 1                | —            |         |                    |              |         |
| Cutaneous                                             | 0.591            | 0.270, 3.077 |         |                    |              |         |
| <b>BRAFV600 mutation</b>                              |                  |              | 0.971   |                    |              |         |
| No                                                    | 1                | —            |         |                    |              |         |
| Yes                                                   | 0.980            | 0.362, 2.665 |         |                    |              |         |
| <b>Response to 1st ICI</b>                            |                  |              | 0.267   |                    |              |         |
| Complete response + Partial response                  | 1                | —            |         |                    |              |         |
| Stable disease                                        | 1.770            | 0.646, 4.852 |         |                    |              |         |
| <b>Duration of 1st ICI (months)</b>                   | 1.019            | 0.98, 1.058  | 0.340   |                    |              |         |
| <b>Time to relapse after 1st ICI (months)</b>         |                  |              | 0.039   |                    |              |         |
| ≤ 6 months                                            | 1                | —            |         |                    |              |         |
| > 6 months                                            | 0.419            | 0.183, 0.96  |         |                    |              |         |
| <b>Systemic treatment between the ICI courses</b>     |                  |              | 0.088   |                    |              |         |
| No                                                    | 1                | —            |         |                    |              |         |
| Yes                                                   | 2.259            | 0.887, 5.755 |         |                    |              |         |
| <b>Local treatment between the ICI courses</b>        |                  |              | 0.100   |                    |              |         |
| No                                                    | 1                | —            |         |                    |              |         |
| Yes                                                   | 0.767            | 0.260, 2.262 |         |                    |              |         |
| <b>Number of metastatic sites (ICI rechallenge)</b>   |                  |              | 0.039   |                    |              | 0.020   |
| > 3                                                   | 1                | —            |         | 1                  |              |         |
| ≤ 3                                                   | 0.413            | 0.179, 0.96  |         | 0.366              | 0.157, 0.856 |         |
| <b>Brain metastasis (ICI rechallenge)</b>             |                  |              | 0.283   |                    |              |         |
| No                                                    | 1                | —            |         |                    |              |         |
| Yes                                                   | 1.606            | 0.677, 3.813 |         |                    |              |         |
| <b>Elevated LDH level (ICI rechallenge)</b>           |                  |              | 0.275   |                    |              |         |
| No                                                    | 1                | —            |         |                    |              |         |
| Yes                                                   | 2.362            | 0.828, 6.742 |         |                    |              |         |
| Unknown                                               | 1.297            | 0.486, 3.462 |         |                    |              |         |
| <b>Corticosteroids (ICI rechallenge)</b>              |                  |              | 0.195   |                    |              | 0.007   |
| No                                                    | 1                | —            |         | 1                  | —            |         |
| Yes                                                   | 2.044            | 0.692, 6.036 |         | 5.395              | 1.578, 18.44 |         |
| <b>2<sup>nd</sup> course of ICI (ICI rechallenge)</b> |                  |              | 0.748   |                    |              |         |
| Rechallenge                                           | 1                | —            |         |                    |              |         |
| Escalation                                            | 1.350            | 0.179, 10.16 |         |                    |              |         |
| Switch                                                | 0.598            | 0.138, 2.595 |         |                    |              |         |
| <b>Toxicity (ICI rechallenge)</b>                     |                  |              | 0.146   |                    |              | 0.025   |
| No                                                    | 1                | —            |         | 1                  | —            |         |
| Yes                                                   | 0.447            | 0.151, 1.325 |         | 0.246              | 0.072, 0.839 |         |

CI: Confidence interval, ECOG: Eastern cooperative oncology group, ICI: Immune checkpoint inhibitor, LDH: Lactate dehydrogenase, OR: Odds ratio. Only factors which are significant are shown in multivariate analysis

**Supplemental Figure S1:** Efficacy of the repeated courses of immune checkpoint inhibitors

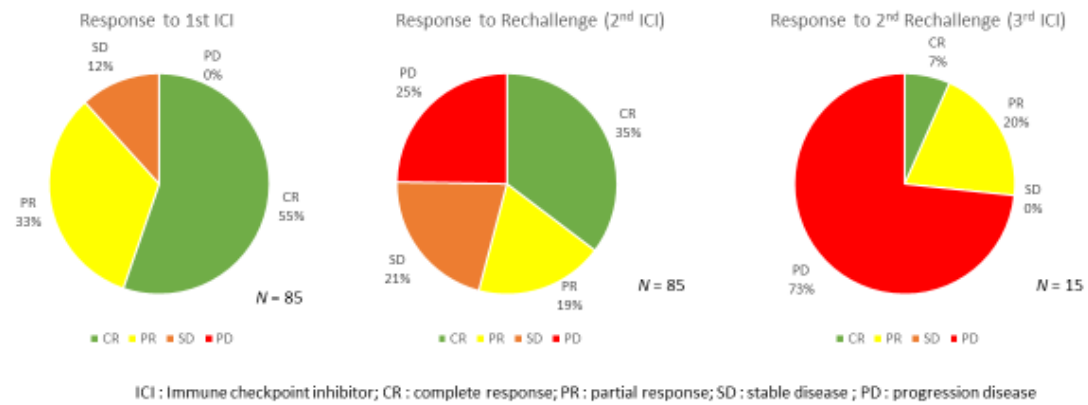

Supplement: s1 [file s1]
